1 **Liquid condensation drives telomere clustering during**  
2 **ALT**

3 **Huaiying Zhang** <sup>1,5\*</sup>, **Michel Liu**<sup>1</sup>, **Robert Dilley**<sup>3</sup>, **David M. Chenoweth**<sup>2</sup>, **Roger A.**  
4 **Greenberg** <sup>3</sup>, **Michael A. Lampson**<sup>1\*</sup>

5

6 <sup>1</sup>Department of Biology, University of Pennsylvania;

7 <sup>2</sup>Department of Chemistry, University of Pennsylvania;

8 <sup>3</sup>Department of Cancer Biology, Bassett Research Center for BRCA, Perelman School of  
9 Medicine, University of Pennsylvania;

10 <sup>5</sup>Department of Biological Sciences, Carnegie Mellon University.

11

12 \*Corresponding author:

13 M.A.L. (email: [lampson@sas.upenn.edu](mailto:lampson@sas.upenn.edu)); H.Z. (email: [huaiyinz@andrew.cmu.edu](mailto:huaiyinz@andrew.cmu.edu))

14

15

16

## 17 **Abstract**

18 Telomerase-free cancer cells employ a recombination-based alternative lengthening of  
19 telomeres (ALT) pathway that depends on ALT-associated promyelocytic leukemia  
20 (PML) nuclear bodies (APBs), whose function is unclear. We find that APBs behave as  
21 liquid condensates, suggesting two potential mechanisms to promote telomere  
22 elongation: condensation to enrich DNA repair factors for telomere synthesis and  
23 coalescence to cluster telomeres to provide repair templates. Using chemically-induced  
24 dimerization, we show that telomere sumoylation nucleates APB condensation via  
25 SUMO-SIM (SUMO interaction motif) interactions and clusters telomeres. The induced  
26 APBs lack DNA repair factors, indicating that these factors are clients recruited to the  
27 APB scaffold rather than components that drive condensation. Telomere clustering,  
28 however, relies only on liquid properties of the condensate, as an alternative  
29 condensation chemistry also induces clustering. Our results demonstrate how the  
30 material properties and chemical composition of APBs independently contribute to ALT,  
31 suggesting a general framework for how liquid condensates promote cellular functions.

32

## 33 **Introduction**

34 Telomeres are repetitive sequences at chromosome ends that shorten with each  
35 division in cells that lack a telomere maintenance mechanism. Critical telomere  
36 shortening induces replicative senescence or apoptosis (Harley et al., 1990), whereas  
37 cancer cells maintain proliferation potential by actively elongating their telomeres. The  
38 majority of human cancer cells re-activate the enzyme telomerase, but a significant  
39 fraction (10-15%) employ an alternative lengthening of telomeres (ALT) pathway that  
40 involves DNA recombination and repair to maintain telomere length (Dilley and  
41 Greenberg, 2015; Lazzarini-Denchi and Sfeir, 2016; Sobinoff and Pickett, 2017). The  
42 molecular mechanisms underlying ALT are unclear, but one unique characteristic is the  
43 presence of APBs, a class of ALT telomere-associated promyelocytic leukemia (PML)  
44 nuclear bodies used for ALT diagnosis (Yeager et al., 1999). PML nuclear bodies are

45 dynamic structures in the nucleus that transiently sequester up to 100 different proteins  
46 that are implicated in many cellular functions including tumor suppression, DNA  
47 replication, gene transcription, DNA repair, viral pathogenicity, cellular senescence and  
48 apoptosis (Lallemant-Breitenbach and de The, 2010). While APBs are proposed to be  
49 sites of telomere recombination during ALT, the precise functions of these specialized  
50 PML nuclear bodies are poorly understood. Inhibiting APB formation by knocking down  
51 PML protein, an essential component of PML nuclear bodies, leads to telomere  
52 shortening (Draskovic et al., 2009; Osterwald et al., 2015), indicating that APBs are  
53 essential for ALT telomere maintenance. In addition to typical PML nuclear body  
54 components, APBs contain proteins involved in homologous recombination such as  
55 replication protein A (RPA), Rad51, and breast cancer susceptibility protein 1 (BRCA1)  
56 (Nabetani and Ishikawa, 2011), which suggests that APBs promote telomere synthesis.  
57 Indeed, new telomere DNA synthesis has been detected in APBs (Cho et al., 2014;  
58 Chung et al., 2011; O'sullivan et al., 2014; Sahin et al., 2014; Zhang et al., 2019).  
59 Telomeres also cluster within APBs, as another unique feature of ALT, presumably to  
60 provide repair templates for telomere DNA synthesis. Many functionally distinct proteins  
61 can initiate APB assembly, leading to the proposal of a multiple-pathway model (Chung  
62 et al., 2011), as suggested by an RNA interference screen that identified close to thirty  
63 proteins that affect APB formation, including proteins involved in telomere and  
64 chromatin organization, protein sumoylation, and DNA repair (Osterwald et al., 2015).  
65 Given such complexity, the mechanisms governing APB assembly and function remain  
66 unclear, and limitations include lack of a conceptual model for how they form and lack of  
67 tools to manipulate the process for cell biological analyses. We previously showed that  
68 introducing DNA damage on telomeres leads to APB formation, telomere clustering  
69 within the induced APBs, and telomere elongation (Cho et al., 2014). While DNA  
70 damage from either replication stress or DSBs at telomeres can trigger APB formation  
71 (O'Sullivan NSMB 2014; Cho et al. Cell 2014), the physical mechanisms underlying  
72 such clustering are unknown.

73

74 Many nuclear bodies and membrane-free organelles – such as P granules, nucleoli,  
75 signaling complexes, and stress granules (Altmeyer et al., 2015; Brangwynne et al.,

76 2011, 2009; Patel et al., 2015a; Su et al., 2016) – assemble by liquid-liquid phase  
77 separation, in which proteins and/or nucleic acids separate from the surrounding milieu  
78 and form a condensed liquid phase (Banani et al., 2017). Components of these  
79 condensates are highly concentrated but can dynamically exchange with the diluted  
80 phase. Liquid phase separation provides a mechanism for organizing matter in cells,  
81 particularly protein interaction networks that do not form stable complexes with fixed  
82 stoichiometry. Notably, such stable complexes are relatively rare, and protein-protein  
83 interactions are dominated by weak interactions (Hein et al., 2015). In vitro  
84 reconstitution has provided valuable insights on how those weak interactions drive the  
85 condensation process, but little is known about how liquid phase separation, particularly  
86 the unique liquid properties of the resulting condensates, promote cellular functions.

87

88 Using a chemical inducer of protein dimerization, we induce de novo APB formation in  
89 live cells and provide evidence that APBs assemble via liquid-liquid phase separation,  
90 driven by SUMO-SIM interactions. We find that the coalescence of APB liquid droplets  
91 drives telomere clustering, depending only on the liquid properties of APBs. Overall, this  
92 work provides tools to manipulate APB assembly, a conceptual model for APB  
93 assembly via liquid-liquid phase separation, and insight into how APB condensation  
94 contributes to ALT.

95

## 96 **Results**

### 97 **SUMO-SIM interactions drive APB liquid condensation to cluster telomeres**

98 Previously, we introduced DNA damage on telomeres in ALT cells by fusing the FokI  
99 nuclease to the telomere binding protein TRF1, which induced APB formation, telomere  
100 clustering within APBs, and telomere elongation (Cho et al., 2014). With this assay, we  
101 observed that APBs exhibit liquid behavior, including coalescence after colliding (Figure  
102 1A, B) and dynamic exchange of components within APBs and with the surrounding  
103 nucleoplasm, as shown by fluorescence recovery after photobleaching (Figure 1C).  
104 These phenomena are characteristics of liquid condensates formed by liquid-liquid

105 phase separation, leading us to hypothesize that APBs are liquid droplets condensed on  
106 telomeres after DNA damage as a mechanism for telomere clustering and elongation.  
107 The liquid nature of APBs would promote telomere clustering via coalescence, and the  
108 condensates may serve as platforms to concentrate DNA repair factors to aid telomere  
109 synthesis. The switch-like self-assembly and disassembly of liquid droplets would allow  
110 APBs to rapidly nucleate as telomeres shorten and subsequently dissolve by reversing  
111 the nucleation signal.

112

113 We considered the possibility that sumoylation of telomere-binding proteins (e.g.,  
114 shelterin complex) triggers APB condensation, driven by multivalent SUMO-SIM  
115 interactions. Many APB components are SUMOylated, contain SIM domains, or both  
116 (Chung et al., 2011; Potts and Yu, 2007; Shen et al., 2006; Shima et al., 2013), and  
117 sumoylation of telomere proteins is required for APB formation (Potts and Yu, 2007).  
118 Furthermore, synthetic SUMO and SIM peptides can drive liquid droplet formation in  
119 vitro (Banani et al., 2016a). These findings are consistent with a model in which SUMO-  
120 SIM interactions on telomere binding proteins cooperate during phase separation to  
121 drive telomere coalescence into ABPs. DNA damage responses triggered by telomere  
122 shortening would be a stimulus to induce SUMOylation. Conversely, desumoylation  
123 after telomere elongation would lead to APB dissolution. Supporting this idea, we  
124 observed enrichment of both SUMO1 and SUMO2/3 after DNA damage induced with  
125 FokI, but not with a FokI mutant that lacks nuclease activity ([Figure 1D-F](#), [Figure 1-](#)  
126 [figure supplement 1](#)).

127

128 To test the hypothesis that telomere sumoylation drives APB condensation via SUMO-  
129 SIM interactions, we developed a protein dimerization approach to induce de novo APB  
130 formation on telomeres without DNA damage. To mimic sumoylation on telomeres and  
131 avoid overexpressing SUMO, we recruited SIM to telomeres with a chemical inducer of  
132 dimerization. We predicted that SIM recruited to telomeres can bring endogenous  
133 SUMO to telomeres to induce APB condensation. The chemical dimerizer consists of  
134 two linked ligands: trimethoprim (TMP) and Haloligand, and can dimerize proteins fused  
135 to the cognate receptors: *Escherichia coli* dihydrofolate reductase (eDHFR) and a

136 bacterial alkyldehalogenase enzyme (Haloenzyme), respectively (Figure 2A). An  
137 advantage of this system is that it is reversible by adding excess TMP to compete for  
138 eDHFR, unlike other chemically induced dimerization systems such as rapamycin  
139 (Ballister et al., 2014; DeRose et al., 2013). We fused Haloenzyme to the telomere  
140 binding protein TRF1 to anchor it to telomeres and to GFP for visualization. SIM was  
141 fused to eDHFR and to mCherry. After adding the dimerizer to cells expressing Halo-  
142 GFP-TRF1 and SIM-mCherry-eDHFR, SIM was recruited to telomeres, which resulted  
143 in enrichment of both SUMO1 and SUMO2/3 on telomeres (Figure 2B-D, Figure 2-  
144 figure supplement 1). To confirm that enrichment of SUMO is indeed based on SUMO-  
145 SIM interaction, we used a SIM mutant that cannot interact with SUMO (Banani et al.,  
146 2016b). As predicted, the SIM mutant was recruited to telomeres without SUMO  
147 enrichment. To confirm that the sites of SIM recruitment are telomeres, we used  
148 fluorescence in situ hybridization (FISH) to visualize telomere DNA directly and  
149 observed colocalization of SIM with telomere signal (Figure 2E).

150

151 To directly test whether SIM recruitment leads to liquid condensation on telomeres, we  
152 used live imaging to monitor TRF1 and SIM signals over time (Movie 1). We observed  
153 that after SIM recruitment, both SIM and TRF1 foci became brighter and bigger (Figure  
154 3A, B), as predicted for liquid droplet nucleation and growth. In addition, both SIM and  
155 TRF1 foci rounded up, indicating formation of liquid condensates. Such liquid behavior  
156 is also shown by fusion events and the dynamic exchange of components, similar to  
157 DNA damage-induced foci (Figure 3D, E). Droplet fusion also drove telomere  
158 clustering, leading to reduced telomere number over time (Figure 3C), although as in  
159 previous studies, we cannot differentiate telomeres from extrachromosomal telomere  
160 DNA that exists in ALT cells (Cho et al., 2014). In contrast, a SIM mutant that cannot  
161 interact with SUMO was recruited to telomeres after dimerization, but did not induce  
162 condensation or telomere clustering (Movie 2, Figure 3-figure supplement 1). Overall,  
163 these findings support our hypothesis that condensation is driven by SUMO-SIM  
164 interactions.

165

166 Our phase transition model predicts that reversal of the nucleation signal will result in  
167 the dissolution of condensates. To test this prediction, we first formed condensates on  
168 telomeres by SIM recruitment and then added free TMP to compete with the dimerizer  
169 for eDHFR binding to reverse dimerization (Ballister et al., 2014). Condensation and  
170 telomere clustering were reversed as the intensity decreased in the foci while increasing  
171 in the nucleoplasm (Movie 3, Figure 3F, G), and telomere number increased (Figure  
172 3H), consistent with our model.

173

### 174 **Functional contributions of APB condensates**

175 APB condensates could promote homology-directed telomere DNA synthesis in ALT by  
176 either or both of two mechanisms: 1) concentrating DNA repair factors on telomeres  
177 through APB condensation, 2) clustering telomeres for repair templates through APB  
178 coalescence. The first mechanism is an example of compositional control of phase-  
179 separated condensates, which can be described with a scaffold-client model (Banani et  
180 al., 2016a). Scaffold components interact with each other to drive condensation, and  
181 clients are recruited to the condensate. Functionally, scaffold components provide a  
182 platform for concentrating clients together for a cellular function. Clients can be recruited  
183 via direct interactions with scaffold components or via additional signaling such as post-  
184 translational modifications.

185

186 To determine whether APB condensates follow a scaffold-client model, we examined  
187 DNA repair factors and PML protein, whose localization on telomeres defines APBs.  
188 Recruiting SIM to telomeres increased colocalization of PML with telomeres, compared  
189 to control cells where SIM was not recruited (Figure 4A-C). Together with our previous  
190 findings that the dimerization-induced condensates contain other known components of  
191 APBs – SUMO (Figure 2B-D, Figure 2-figure supplement 1), telomere DNA (Figure 2E)  
192 and TRF1 (Figure 3) – this result indicates that the induced condensates are indeed  
193 APBs with PML as a scaffold component. Such an increase in PML localization to  
194 telomeres was not seen when the SIM mutant was recruited, agreeing with the  
195 hypothesis that SUMO-SIM interactions drive APB condensation. As potential clients,

196 we looked at proteins involved in the DNA damage response and repair pathways:  
197 53BP1, PCNA, and POLD3, which localize to APBs induced by DNA damage (Cho et  
198 al., 2014; Dilley et al., 2016). None of these factors was recruited after dimerization-  
199 induced condensation (Figure 4D-F, Figure 4-figure supplement 1), indicating that they  
200 are client molecules recruited to the APB scaffold, independent of condensation, via  
201 additional signaling.

202

203 Our model predicts that the ability to cluster telomeres relies on the liquid material  
204 properties of APBs and not on specific scaffold or client proteins. To test this prediction,  
205 we aimed to induce non-APB liquid droplets with a different chemistry on telomeres and  
206 determine whether they can cluster telomeres. Besides multivalent interactions between  
207 modular interaction pairs such as SUMO and SIM, another way of driving condensation  
208 is through interactions between disordered or no complexity protein domains that  
209 behave like flexible polymers (Elbaum-Garfinkle et al., 2015a; Lin et al., 2015; Nott et  
210 al., 2015; Patel et al., 2015b; Zhang et al., 2015). We selected the arginine/glycine-rich  
211 (RGG) domain from the P granule component LAF-1, which forms liquid condensates in  
212 vitro and in vivo (Elbaum-Garfinkle et al., 2015b; Schuster et al., 2018). Recruiting RGG  
213 to telomeres resulted in condensation as shown by the increase in telomere foci  
214 intensity (Movie 4, Figure 5A, B). The induced condensates exhibited liquid behavior  
215 such as the ability to fuse, which led to telomere clustering as shown by the decrease in  
216 telomere foci over time (Figure 5C, D). We also confirmed that the RGG condensates  
217 were indeed on telomeres, and did not increase PML protein on telomeres compared  
218 with cells without RGG recruited (Figure 5 E-G), indicating the induced condensates are  
219 not APBs. These results support our model that liquid condensation drives telomere  
220 clustering independent of specific protein components of the condensates.

221

## 222 Discussion

223 We propose a liquid-liquid phase separation model for APB assembly triggered by telomere  
224 sumoylation via SUMO-SIM interactions as part of a DNA damage response at telomeres



225 (Figure 5H). We induced APB condensation by recruiting SIM to telomeres using a chemical  
226 dimerizer, independent of DNA damage. Conversely, we find that releasing SIM from  
227 telomeres reverses APB condensation. These findings indicate that APB condensates are  
228 nucleated on telomeres via sumoylation and dissolved via desumoylation. Sumoylation has  
229 long been observed as part of the DNA damage response (Hendriks and Vertegaal, 2015), and  
230 PML nuclear bodies are also implicated in DNA repair (Dellaire and Bazett-Jones, 2004),  
231 though the molecular mechanisms of both remain unclear. Our observation that sumoylation  
232 nucleates APB condensates as a mechanism for telomere elongation may lead to future  
233 insights on the roles of sumoylation and PML bodies in DNA repair in other contexts (Sarangi  
234 and Zhao, 2015; Xu et al., 2003).

235  
236 The induced condensates contain the APB signature component PML but not DNA repair  
237 factors such as 53BP1, PCNA and POLD3 (Figure 4, Figure 4-figure supplement 1), indicating  
238 that the repair factors are client molecules recruited to the APB scaffold by DNA damage  
239 response signaling other than the telomere sumoylation that nucleates APBs (Figure 5H).  
240 Other aspects of sumoylation, such as protein conformational changes, are not mimicked by  
241 our SIM recruitment approach and may be important for recruiting DNA repair factors. In  
242 addition to telomere binding proteins, many DNA repair factors are also sumoylated including  
243 53BP1 and PCNA (Garvin and Morris, 2017). Sumoylation of those DNA repair factors, not  
244 captured in our dimerization approach, may be required for recruitment to APBs. It is also  
245 possible that other posttranslational modifications (PTMs) are required to regulate interactions  
246 of DNA repair factors with APB components. Indeed, the DNA damage response is a complex  
247 process that involves a multitude of PTMs including phosphorylation, ubiquitylation,  
248 sumoylation, neddylation, poly (ADP-ribosyl)ation, acetylation, and methylation of chromatin  
249 and chromatin-associated proteins (Dantuma and van Attikum, 2016). It is still unclear how  
250 those PTMs are spatially and temporally regulated to work together in DNA repair. Here we  
251 show that sumoylation is responsible for nucleating APBs, and future studies revealing what  
252 signaling is required for recruitment of client molecules to the APB scaffold will provide insights  
253 on how sumoylation together with other PTMs promotes telomere DNA synthesis in ALT and in  
254 DNA repair more broadly.

255

256 We showed that coalescence of APB liquid droplets drives telomere clustering (Figure 3A-E),  
257 which is thought to provide repair templates for homology-directed telomere DNA synthesis in  
258 ALT. ALT cells contain extrachromosomal telomere DNAs (ECTRs) that may either be linear or  
259 circular, but their functional contribution to ALT is unknown (Cesare and Griffith, 2004). They  
260 share sequence identity with telomeres and cannot be differentiated with our TRF1 probe or  
261 other labeling techniques targeting telomere DNA sequence. Therefore, the clustering we  
262 observe may involve APBs nucleated on both telomeres and ECTR. Since ECTR are more  
263 mobile, they may be more efficient in clustering with telomeres to provide repair templates.  
264 Further studies dissecting the role of ECTR in telomere clustering would increase our  
265 understanding of templating in ALT. We also demonstrated that the ability to cluster telomeres  
266 depends only on the liquid properties of APB condensates, not their chemical composition  
267 (Figure 5). This finding provides an opportunity to target the physical-chemical properties of  
268 APBs for cancer therapy in ALT without affecting function of APB components in normal cells.

269

270 Liquid-liquid phase separation can contribute to cellular functions by multiple mechanisms. For  
271 example, the high sensitivity of the phase separation process to environmental factors makes it  
272 ideal for sensing stress (Munder et al., 2016; Riback et al., 2017), and concentrating and  
273 confining molecules into one compartment can increase the kinetics of biochemistry (Case et  
274 al., 2019). The hallmark of such phase separation is the liquid properties of the resulting  
275 condensates, which have been carefully characterized in reconstituted systems. The functional  
276 significance of these in vitro findings in cells have been widely implied but not demonstrated  
277 yet (Shin and Brangwynne, 2017). With dimerization-induced condensation, we show that the  
278 liquid properties of APB condensates drive telomere clustering, independent of condensate  
279 chemistry. Our findings may represent a general strategy for reversible genome organization,  
280 such as clustering of gene loci for transcription and DNA repair, and suggest a dual function  
281 model for chromatin condensates: concentrating factors for biochemistry through composition  
282 control while clustering distinct chromatin domains via coalescence.

283

## 284 Acknowledgments

285 We thank Stephanie Weber for sharing MATLAB code for analyzing foci intensity in 3D and  
286 Michael Rosen and Benjamin Schuster for sharing plasmids. We thank members of the  
287 Greenberg lab and Lampson lab for helpful discussions. This work was supported by the  
288 National Institutes of Health (GM122475 to M.A.L., GM118510 to D.M.C., U54-CA193417 to  
289 Physical Sciences Oncology Center at Penn, 1K22CA237632-01 to H.Z., GM101149 and  
290 CA17494 to R.A.G.).

291

## 292 Figure Legends

293 **Figure 1. APBs exhibit liquid behavior and concentrate SUMO.** APB formation was  
294 induced by creating DNA damage on telomeres with TRF1-FokI. **(A-B)** Cells were  
295 imaged live starting 1 hour after triggering mCherry-TRF1-FokI import into the nucleus.  
296 Images show clustering of TRF1 foci (A) and fusion (B, insets), quantified by change in  
297 aspect ratio (defined as length/width) over time (exponential fit: 15 min half time). **(C)**  
298 Fluorescence recovery after photobleaching (FRAP) of DNA damage-induced APBs.  
299 Insets shows a single APB, intensity normalized to the first time point, exponential fit: 30  
300 s recovery half time. **(D-F)** SUMO1 immunofluorescence for cells expressing TRF1-FokI  
301 or a nuclease-dead mutant. The overlay of FokI (purple) and SUMO1 (green) appears  
302 white (D, insets two times enlarged). Graphs show the percent of telomeres with  
303 SUMO1 foci and the integrated intensity of SUMO1 foci on telomeres. Each data point  
304 represents one cell from two biological replicates, black lines mean, gray bars 95%  
305 confidence interval. Scale bars 5  $\mu\text{m}$  (A, D) or 1  $\mu\text{m}$  (B, C). Also see Figure 1–figure  
306 supplement 1.

307 **Figure 2. Recruiting SUMO to telomeres through SIM with a chemical dimerizer. (A)**  
308 Dimerization schematic: SIM is fused to mCherry and eDHFR, and TRF1 is fused to Halo and  
309 GFP. The dimerizer is TNH: TMP(trimethoprim)-NVOC (6-nitroveratryl oxycarbonyl)-Halo  
310 (Zhang et al., 2017). **(B-D)** Cells expressing SIM-mCherry-DHFR (WT) or a SIM mutant that  
311 cannot interact with SUMO, together with Halo-GFP-TRF1, were incubated with TNH before  
312 fixing and staining for SUMO2/3. The overlay of SIM (purple) and SUMO2/3 (cyan) appears

313 white (B, insets two times enlarged). Graphs show the number of telomeres with SUMO2/3 foci  
314 and the integrated intensity of SUMO2/3 foci on telomeres. Each data represents one cell from  
315 two biological replicates, black lines mean, gray bars 95% confidence interval. **(E)** Telomere  
316 FISH images after recruiting SIM or SIM mutant to telomeres. The overlay of SIM (purple) and  
317 telomere DNA FISH (green) appears white. Scale bars 5  $\mu\text{m}$ . Also see Figure 2–figure  
318 supplement 1.

319 **Figure 3. SUMO-SIM interactions drive liquid condensation and telomere clustering. (A-D)**  
320 TNH was added to cells expressing SIM-mCherry-DHFR and Halo-GFP-TRF1 after the first time  
321 point to induce dimerization. Graphs show mean integrated intensity per TRF1 foci (B, error  
322 bars SEM) and number of TRF1 foci (C) over time. Insets (D) show an example of a fusion  
323 event, with the change in aspect ratio quantified (exponential fit, decay time 13 min). **(E)** FRAP  
324 of dimerization-induced condensates. Intensity is normalized to the first time point, exponential  
325 fit: 22 s recovery half time. **(F-H)** After dimerization induced by TNH in cells expressing SIM-  
326 mCherry-DHFR and Halo-GFP-TRF1, TMP was added to release SIM from telomeres. Scale  
327 bars 5  $\mu\text{m}$ . Also see Figure 3–figure supplement 1.

328 **Figure 4. Condensates contain APB scaffold components but not DNA repair factors. (A-**  
329 **C)** FISH of telomere DNA and immunofluorescence of PML for cells with or without SIM  
330 recruited to telomeres or with SIM mutant recruited to telomeres. The overlay of PML (purple)  
331 and telomere DNA (green) appears white (A, insets two times enlarged), indicating APBs with  
332 PML nuclear bodies localized to telomeres. Graphs show APB number and integrated APB  
333 intensity per cell. **(D-F)** Immunofluorescence of PCNA for cells with FokI-induced damage or  
334 with SIM or SIM mutant recruited. In representative images (D, insets two times enlarged), X  
335 indicates FokI, SIM or SIM mutant, and colocalization with PCNA appears white in overlay  
336 images (right panels). Graphs show number of PCNA foci colocalized with FokI, SIM, or SIM  
337 mutant and integrated intensity. Each data point (B, C, E, F) represents one cell from two  
338 biological replicates, black line mean, gray bar 95% confidence interval. Scale bars 5  $\mu\text{m}$ .  
339 Also see Figure 4–figure supplement 1.

340 **Figure 5. Non-APB condensation on telomeres drives telomere clustering. (A-D)**  
341 TNH was added to cells expressing RGG-mCherry-RGG-eDHFR and Halo-GFP-TRF1  
342 to induce dimerization and condensation. Graphs show integrated intensity per TRF1  
343 foci (B, error bars SEM) and number of TRF1 foci (C) over time. Insets (D) show an

344 example of a fusion event, with the change in aspect ratio quantified (exponential fit,  
345 decay time 6 min). **(E-G)** FISH of telomere DNA and immunofluorescence of PML for  
346 cells with or without RGG recruitment. In representative images (E) the overlay of PML  
347 (purple) and telomere DNA (green) appears white, indicating APBs with PML nuclear  
348 bodies localized to telomeres. Insets (two times enlarged) show two telomere foci, one  
349 with an APB and one without, indicating the basal level of APBs in these cells. Graphs  
350 show APB number per cell and integrated APB intensity per cell. Each data point (F, G)  
351 represents one cell from two biological replicates, black line mean, gray bar 95%  
352 confidence interval. **(H)** Model for APB condensation and function. Telomere shortening  
353 (or replication stress) triggers a DNA damage response, where telomere sumoylation  
354 nucleates APB condensation and drives telomere clustering while another aspect of the  
355 damage response pathway recruits DNA repair factors to APB condensates. Together  
356 the clustered telomeres and enriched DNA repair factors within APBs lead to homology-  
357 directed telomere synthesis in ALT. Scale bars 5  $\mu\text{m}$ .

358 **Figure 1–figure supplement 1. SUMO2/3 is enriched on telomeres after DNA**  
359 **damage.** Immunofluorescence images of SUMO2/3 for cells with FokI or a nuclease  
360 dead FokI mutant targeted to telomeres. Scale bars 5  $\mu\text{m}$ .

361 **Figure 2–figure supplement 1. SUMO1 is enriched on telomeres after SIM**  
362 **recruitment.** Immunofluorescence images of SUMO1 after recruiting SIM or SIM  
363 mutant to telomeres (A), and quantification of the number of telomeres with SUMO1 foci  
364 per cell (B) and the integrated intensity of SUMO1 foci on telomeres per cell (C). Each  
365 data point in (B) and (C) represents one cell from two biological replicates, black line  
366 represents the average value, and gray bar represents 95% confidence interval. Scale  
367 bars 5  $\mu\text{m}$ .

368 **Figure 3–figure supplement 1. SIM mutant recruited to telomeres cannot induce**  
369 **condensation and clustering.** TNH was added to cells expressing SIM mutant-  
370 mCherry-DHFR and Halo-GFP-TRF1 after the first time point to induce dimerization.  
371 Graphs show mean integrated intensity per TRF1 foci (B, error bars SEM) and number

372 of TRF1 foci (C) over time. In contrast to SIM recruitment, telomere number stayed  
373 unchanged and the intensity was not increased, but decreased due to photobleaching

374 **Figure 4—figure supplement 1. Unlike damaged-induced APBs, dimerization-**  
375 **induced condensates do not enrich 53BP1 or POLD3. (A)** Immunofluorescence  
376 images of 53BP1 (A) or POLD3 (B) on telomeres with FokI tethered or SIM recruited.  
377 Scale bars 5  $\mu$ m.

378 **Movie 1. Recruit SIM to telomeres.** Movie for Figure 3A. Left: SIM-mCherry-eDHFR,  
379 middle: Halo-GFP-TRF1, right: composite of SIM (magenta) and TRF1 (green). TNH  
380 was added to cells after the first time point to induce dimerization. Yellow box highlights  
381 a fusion event.

382 **Movie 2. Recruit SIM mutant to telomeres.** Movie for Figure 3-figure supplement 1.  
383 Left: SIM mutant-mCherry-eDHFR, middle: TRF1-GFP-Halo, right: composite of SIM  
384 mutant (magenta) and TRF1 (green). TNH was added to cells after the first time point to  
385 induce dimerization.

386 **Movie 3. Release SIM from telomeres.** Movie for Figure 3F. Left: SIM-mCherry-  
387 eDHFR, middle: Halo-GFP-TRF1, right: composite of SIM (magenta) and TRF1 (green).  
388 Cells were incubated with TNH to induce dimerization for 2 hours before imaging. TMP  
389 was added after the first time point to release SIM from telomeres.

390 **Movie 4. Recruit RGG to telomeres.** Movie for Figure 5A. Left: RGG-mCherry-RGG-  
391 eDHFR, middle: Halo-GFP-TRF1, right: composite of RGG (magenta) and TRF1  
392 (green). TNH was added to cells after the first time point to induce dimerization. Yellow  
393 box highlights a fusion event.

394

## 395 **Materials and Methods**

### 396 **Plasmids**

397 The plasmids for inducing DNA damage at telomeres (mCherry-ER-DD-TRF1-FokI or  
398 FokI mutant) were previously published (Cho et al., 2014). For recruiting SIM to  
399 telomeres, TRF1 was substituted for SPC25 in the published 3xHalo-GFP-SPC25  
400 plasmid (Zhang et al., 2017). SIM (or SIM mutant) for SIM-mCherry-eDHFR is from  
401 plasmids gifted by Michel Rosen (Banani et al., 2016b). The RGG insert for RGG-  
402 mCherry-RGG-eDHFR is from a plasmid gifted by Benjamin Schuster (Schuster et al.,  
403 2018). The vector containing mCherry-eDHFR is from our published plasmid Mad1-  
404 mCherry-eDHFR (Zhang et al., 2017). All other plasmids in this study are derived from a  
405 plasmid that contains a CAG promoter for constitutive expression, obtained from E. V.  
406 Makeyev (Khandelia et al., 2011).

#### 407 **Cell culture**

408 All experiments were performed with U2OS acceptor cells, originally obtained from E.V.  
409 Makayev, Nanyang Technological University, Singapore (Khandelia et al., 2011). Cells  
410 were cultured in growth medium (Dulbecco's Modified Eagle's medium with 10% FBS  
411 and 1% penicillin–streptomycin) at 37 °C in a humidified atmosphere with 5% CO<sub>2</sub>. The  
412 TRF1 constructs (3xHalo-GFP-TRF1, 3xHalo-TRF1, or mCherry-ER-DD-TRF1-FokI)  
413 and the eDHFR constructs (SIM, SIM mutant, or RGG) were transiently expressed by  
414 transfection with Lipofectamine 2000 (Invitrogen) 24 hours prior to imaging, following  
415 the manufacturer's protocol.

#### 416 **Dimerization and damage on telomeres**

417 To recruit proteins to telomeres, cells transfected with 3xHalo-GFP-TRF1 or 3xHalo-  
418 TRF1 and one of the mCherry-eDHFR plasmids (SIM, SIM mutant, or RGG) were  
419 treated with the dimerizer TNH: TMP(trimethoprim)-NVOC (6-nitroveratryl oxycarbonyl)-  
420 Halo (Zhang et al., 2017). For live imaging, 100 nM TNH was added directly to cells on  
421 the microscope stage. For IF or FISH, 100 nM TNH was added to cells and incubated  
422 for 2 hours before fixing. To induce damage on telomere in cells transfected with  
423 mCherry-ER-DD-TRF1-FokI, Shield-1 (Cheminpharma LLC) and 4-hydroxytamoxifen  
424 (4-OHT) (Sigma-Aldrich) at 1 μM were added for one hour to allow TRF1 to enter the  
425 nucleus prior to live imaging or two hours prior to fixing, as previously described (Cho et  
426 al., 2014).

## 427 **Immunofluorescence (IF) and fluorescence in situ hybridization (FISH)**

428 Cells were fixed in 4% formaldehyde for 10 min at room temperature, followed by  
429 permeabilization in 0.5% Triton X-100 for 10 min. Cells were incubated with primary  
430 antibody at 4°C in a humidified chamber overnight and then with secondary antibody for  
431 one hour at room temperature before washing and mounting. Primary antibodies were  
432 anti-SUMO1 (Ab32058, Abcam, 1:200 dilution), anti-SUMO2/3 (Asm23, Cytoskeleton,  
433 1:200 dilution), anti-PCNA (P10, Cell Signaling, 1:1000 dilution), anti-53BP1 (NB100-  
434 904, Novus Biologicals, 1:1000 dilution), anti-PML (sc966, Santa Cruz, 1:50 dilution),  
435 anti-POLD3 (H00010714-M01, Abnova, 1:100 dilution). For IF-FISH, coverslips were  
436 first stained with primary and secondary antibody, then fixed again in 4% formaldehyde  
437 for 10 min at room temperature. Coverslips were then dehydrated in an ethanol series  
438 (70%, 80%, 90%, 2 minutes each) and incubated with 488-telG PNA probe (Panagene)  
439 at 75 °C for 5 min and then overnight in a humidified chamber at room temperature.  
440 Coverslips were then washed and mounted for imaging.

## 441 **Image acquisition**

442 For live imaging, cells were seeded on 22x22mm glass coverslips (no. 1.5; Fisher  
443 Scientific) coated with poly-D-lysine (Sigma-Aldrich) in single wells of a 6-well plate.  
444 When ready for imaging, coverslips were mounted in magnetic chambers (Chamlide  
445 CM-S22-1, LCI) with cells maintained in L-15 medium without phenol red (Invitrogen)  
446 supplemented with 10% FBS and 1% penicillin/streptomycin at 37 °C on a heated stage  
447 in an environmental chamber (Incubator BL; PeCon GmbH). Images were acquired with  
448 a spinning disk confocal microscope (DM4000; Leica) with a 100x 1.4 NA objective, an  
449 XY Piezo-Z stage (Applied Scientific Instrumentation), a spinning disk (Yokogawa), an  
450 electron multiplier charge-coupled device camera (ImageEM; Hamamatsu Photonics),  
451 and a laser merge module equipped with 488 and 593 nm lasers (LMM5; Spectral  
452 Applied Research) controlled by MetaMorph software (Molecular Devices). Images were  
453 taken with 0.5 µm spacing for a total of 6 µm and 5 mins time interval for 2-4 hours for  
454 both GFP and mCherry channels. Fixed cells were imaged using a 100x 1.4 NA  
455 objective on an inverted fluorescence microscope (DM6000, Leica Micro- systems)  
456 equipped with an automated XYZ stage (Ludl Electronic Products), a charge-coupled



457 device camera (QuantEM 512SC, Photometrics), an X-LIGHT Confocal Imager (Crisel  
458 Electrooptical Systems) and an IDI high performance fluorescence illuminator equipped  
459 with 405, 445, 470, 520, 528, 555 and 640 nm lasers (89 North and Cairn Research  
460 LTD), controlled by Metamorph Software (MDS Analytical Technologies). Images were  
461 taken with 0.3  $\mu\text{m}$  spacing for a total of 8  $\mu\text{m}$ .

## 462 **Image processing**

463 All images shown are maximum-intensity projections from all slices in z-stacks  
464 generated in Image J (Schneider et al., 2012). Quantifications of images and plotting of  
465 figures were done in MATLAB (MathWorks). For live imaging, TRF1 foci in the GFP  
466 channel were identified with a 3D bandpass filter with custom MATLAB code modified  
467 based on gift code from Stephanie Weber (Berry et al., 2015). The number of  
468 segmented TRF1 foci and integrated fluorescence intensity per foci were calculated at  
469 each time point. The integrated fluorescence intensity per foci was calculated by first  
470 summing up the total intensity over all Z slices in the foci and then calculating the  
471 average value over all foci in the cell. For colocalization analysis of fixed images, both  
472 channels were segmented with a 3D bandpass filter. The number of colocalized foci and  
473 the total fluorescence intensity summed over all Z slices and over all colocalized foci in  
474 one cell were plotted.

## 475 **Statistical analyses**

476 All p values were generated with two-sample t-test in MATLAB with function ttest2.

477

## 478 **Competing interests: non.**

## 479 **References**

- 480 Altmeyer M, Neelsen KJ, Teloni F, Pozdnyakova I, Pellegrino S, Grøfte M, Rask M-BD,  
481 Streicher W, Jungmichel S, Nielsen ML, Lukas J. 2015. Liquid demixing of  
482 intrinsically disordered proteins is seeded by poly(ADP-ribose). *Nat Commun* **6**:8088.  
483 doi:10.1038/ncomms9088
- 484 Ballister ER, Aonbangkhen C, Mayo AM, Lampson M a., Chenoweth DM. 2014. Localized

- 485 light-induced protein dimerization in living cells using a photocaged dimerizer. *Nat*  
486 *Commun* **5**:5475. doi:10.1038/ncomms6475
- 487 Banani SF, Lee HO, Hyman AA, Rosen MK. 2017. Biomolecular condensates: organizers  
488 of cellular biochemistry. *Nat Rev Mol Cell Biol* **18**:285–298. doi:10.1038/nrm.2017.7
- 489 Banani SF, Rice AM, Peeples WB, Lin Y, Jain S, Parker R, Rosen MK. 2016a.  
490 Compositional Control of Phase-Separated Cellular Bodies. *Cell* **166**:651–663.  
491 doi:10.1016/j.cell.2016.06.010
- 492 Banani SF, Rice AM, Peeples WB, Lin Y, Jain S, Parker R, Rosen MK. 2016b.  
493 Compositional Control of Phase-Separated Cellular Bodies. *Cell* **166**:651–663.  
494 doi:10.1016/j.cell.2016.06.010
- 495 Berry J, Weber SC, Vaidya N, Haataja M, Brangwynne CP. 2015. RNA transcription  
496 modulates phase transition-driven nuclear body assembly. *Proc Natl Acad Sci U S A*  
497 **112**:E5237–45. doi:10.1073/pnas.1509317112
- 498 Brangwynne CP, Eckmann CR, Courson DS, Rybarska A, Hoege C, Gharakhani J,  
499 Jülicher F, Hyman AA. 2009. Germline P granules are liquid droplets that localize by  
500 controlled dissolution/condensation. *Science* **324**:1729–32.  
501 doi:10.1126/science.1172046
- 502 Brangwynne CP, Mitchison TJ, Hyman AA. 2011. Active liquid-like behavior of nucleoli  
503 determines their size and shape in *Xenopus laevis* oocytes. *Proc Natl Acad Sci U S*  
504 *A* **108**:4334–9. doi:10.1073/pnas.1017150108
- 505 Case LB, Zhang X, Ditlev JA, Rosen MK. 2019. Stoichiometry controls activity of phase  
506 separated clusters of actin signaling proteins. *Science In Press*:1093–1097.  
507 doi:10.1126/science.aau6313
- 508 Cesare AJ, Griffith JD. 2004. Telomeric DNA in ALT cells is characterized by free  
509 telomeric circles and heterogeneous t-loops. *Mol Cell Biol* **24**:9948–9957.  
510 doi:10.1128/mcb.24.22.9948-9957.2004
- 511 Cho NW, Dilley RL, Lampson MA, Greenberg RA. 2014. Interchromosomal homology  
512 searches drive directional ALT telomere movement and synapsis. *Cell* **159**:108–21.  
513 doi:10.1016/j.cell.2014.08.030

- 514 Chung I, Leonhardt H, Rippe K. 2011. De novo assembly of a PML nuclear  
515 subcompartment occurs through multiple pathways and induces telomere elongation.  
516 *J Cell Sci* **124**:3603–18. doi:10.1242/jcs.084681
- 517 Dantuma NP, van Attikum H. 2016. Spatiotemporal regulation of posttranslational  
518 modifications in the DNA damage response. *EMBO J* **35**:6–23.  
519 doi:10.15252/embj.201592595
- 520 Dellaire G, Bazett-Jones DP. 2004. PML nuclear bodies: dynamic sensors of DNA  
521 damage and cellular stress. *Bioessays* **26**:963–77. doi:10.1002/bies.20089
- 522 DeRose R, Miyamoto T, Inoue T. 2013. Manipulating signaling at will: chemically-  
523 inducible dimerization (CID) techniques resolve problems in cell biology. *Pflugers*  
524 *Arch* **465**:409–17. doi:10.1007/s00424-012-1208-6
- 525 Dilley RL, Greenberg RA. 2015. ALTerNative Telomere Maintenance and Cancer. *Trends*  
526 *in Cancer* **1**:145–156. doi:10.1016/j.trecan.2015.07.007
- 527 Dilley RL, Verma P, Cho NW, Winters HD, Wondisford AR, Greenberg RA. 2016. Break-  
528 induced telomere synthesis underlies alternative telomere maintenance. *Nature*.  
529 doi:10.1038/nature20099
- 530 Draskovic I, Arnoult N, Steiner V, Bacchetti S, Lomonte P, Londoño-Vallejo A. 2009.  
531 Probing PML body function in ALT cells reveals spatiotemporal requirements for  
532 telomere recombination. *Proc Natl Acad Sci U S A* **106**:15726–31.  
533 doi:10.1073/pnas.0907689106
- 534 Elbaum-Garfinkle S, Kim Y, Szczepaniak K, Chen CC-H, Eckmann CR, Myong S,  
535 Brangwynne CP. 2015a. The disordered P granule protein LAF-1 drives phase  
536 separation into droplets with tunable viscosity and dynamics. *Proc Natl Acad Sci U*  
537 *S A*. doi:10.1073/pnas.1504822112
- 538 Elbaum-Garfinkle S, Kim Y, Szczepaniak K, Chen CC-H, Eckmann CR, Myong S,  
539 Brangwynne CP. 2015b. The disordered P granule protein LAF-1 drives phase  
540 separation into droplets with tunable viscosity and dynamics. *Proc Natl Acad Sci U*  
541 *S A* **112**:7189–94. doi:10.1073/pnas.1504822112
- 542 Garvin AJ, Morris JR. 2017. Sumo, a small, but powerful, regulator of double-strand break

- 543 repair. *Philos Trans R Soc B Biol Sci*. doi:10.1098/rstb.2016.0281
- 544 Harley CB, Futcher AB, Greider CW. 1990. Telomeres shorten during ageing of human  
545 fibroblasts. *Nature* **345**:458–60. doi:10.1038/345458a0
- 546 Hein MY, Hubner NC, Poser I, Cox J, Nagaraj N, Toyoda Y, Gak IA, Weisswange I,  
547 Mansfeld J, Buchholz F, Hyman AA, Mann M. 2015. A human interactome in three  
548 quantitative dimensions organized by stoichiometries and abundances. *Cell*  
549 **163**:712–23. doi:10.1016/j.cell.2015.09.053
- 550 Hendriks IA, Vertegaal ACO. 2015. SUMO in the DNA damage response. *Oncotarget*  
551 **6**:15734–15735. doi:10.18632/oncotarget.4605
- 552 Khandelia P, Yap K, Makeyev E V. 2011. Streamlined platform for short hairpin RNA  
553 interference and transgenesis in cultured mammalian cells. *Proc Natl Acad Sci U S*  
554 *A* **108**:12799–804. doi:10.1073/pnas.1103532108
- 555 Lallemand-Breitenbach V, de The H. 2010. PML Nuclear Bodies. *Cold Spring Harb*  
556 *Perspect Biol* **2**:a000661–a000661. doi:10.1101/cshperspect.a000661
- 557 Lazzerini-Denchi E, Sfeir A. 2016. Stop pulling my strings-what telomeres taught us about  
558 the DNA damage response. *Nat Rev Mol Cell Biol* **17**:364–378.  
559 doi:10.1038/nrm.2016.43
- 560 Lin Y, Protter DSW, Rosen MK, Parker R. 2015. Formation and Maturation of Phase-  
561 Separated Liquid Droplets by RNA-Binding Proteins. *Mol Cell* **60**:208–19.  
562 doi:10.1016/j.molcel.2015.08.018
- 563 Munder MC, Midtvedt D, Franzmann T, Nüske E, Otto O, Herbig M, Ulbricht E, Müller P,  
564 Taubenberger A, Maharana S, Malinowska L, Richter D, Guck J, Zaburdaev V, Alberti  
565 S. 2016. A pH-driven transition of the cytoplasm from a fluid- to a solid-like state  
566 promotes entry into dormancy. *Elife* **5**. doi:10.7554/eLife.09347
- 567 Nabetani A, Ishikawa F. 2011. Alternative lengthening of telomeres pathway:  
568 recombination-mediated telomere maintenance mechanism in human cells. *J*  
569 *Biochem* **149**:5–14. doi:10.1093/jb/mvq119
- 570 Nott TJ, Petsalaki E, Farber P, Jervis D, Fussner E, Plochowietz A, Craggs TD, Bazett-

- 571 Jones DP, Pawson T, Forman-Kay JD, Baldwin AJ. 2015. Phase transition of a  
572 disordered nuage protein generates environmentally responsive membraneless  
573 organelles. *Mol Cell* **57**:936–47. doi:10.1016/j.molcel.2015.01.013
- 574 O'sullivan RJ, Arnoult N, Lackner DH, Oganessian L, Haggblom C, Corpet A, Almouzni G,  
575 Karlseder J. 2014. Rapid induction of alternative lengthening of telomeres by  
576 depletion of the histone chaperone ASF1. *Nat Publ Gr* **21**. doi:10.1038/nsmb.2754
- 577 Osterwald S, Deeg KI, Chung I, Parisotto D, Wörz S, Rohr K, Erfle H, Rippe K. 2015. PML  
578 induces compaction, TRF2 depletion and DNA damage signaling at telomeres and  
579 promotes their alternative lengthening. *J Cell Sci* **128**:1887–900.  
580 doi:10.1242/jcs.148296
- 581 Patel A, Lee HO, Jawerth L, Maharana S, Jahnel M, Hein MY, Stoyanov S, Mahamid J,  
582 Saha S, Franzmann TM, Pozniakovski A, Poser I, Maghelli N, Royer LA, Weigert M,  
583 Myers EW, Grill S, Drechsel D, Hyman AA, Alberti S. 2015a. A Liquid-to-Solid Phase  
584 Transition of the ALS Protein FUS Accelerated by Disease Mutation. *Cell* **162**:1066–  
585 77. doi:10.1016/j.cell.2015.07.047
- 586 Patel A, Lee HO, Jawerth L, Maharana S, Jahnel M, Hein MY, Stoyanov S, Mahamid J,  
587 Saha S, Franzmann TM, Pozniakovski A, Poser I, Maghelli N, Royer LA, Weigert M,  
588 Myers EW, Grill S, Drechsel D, Hyman AA, Alberti S. 2015b. A Liquid-to-Solid Phase  
589 Transition of the ALS Protein FUS Accelerated by Disease Mutation. *Cell* **162**:1066–  
590 77. doi:10.1016/j.cell.2015.07.047
- 591 Potts PR, Yu H. 2007. The SMC5/6 complex maintains telomere length in ALT cancer  
592 cells through SUMOylation of telomere-binding proteins. *Nat Struct Mol Biol* **14**:581–  
593 590. doi:10.1038/nsmb1259
- 594 Riback JA, Katanski CD, Kear-Scott JL, Pilipenko E V., Rojek AE, Sosnick TR,  
595 Drummond DA. 2017. Stress-Triggered Phase Separation Is an Adaptive,  
596 Evolutionarily Tuned Response. *Cell* **168**:1028-1040.e19.  
597 doi:10.1016/j.cell.2017.02.027
- 598 Sahin U, Ferhi O, Jeanne M, Benhenda S, Berthier C, Jollivet F, Niwa-Kawakita M,  
599 Faklaris O, Setterblad N, de Thé H, Lallemand-Breitenbach V. 2014. Oxidative

- 600 stress-induced assembly of PML nuclear bodies controls sumoylation of partner  
601 proteins. *J Cell Biol* **204**:931–45. doi:10.1083/jcb.201305148
- 602 Sarangi P, Zhao X. 2015. SUMO-mediated regulation of DNA damage repair and  
603 responses. *Trends Biochem Sci* **40**:233–242. doi:10.1016/j.tibs.2015.02.006
- 604 Schneider CA, Rasband WS, Eliceiri KW. 2012. NIH Image to ImageJ: 25 years of image  
605 analysis. *Nat Methods* **9**:671–675. doi:10.1038/nmeth.2089
- 606 Schuster BS, Reed EH, Parthasarathy R, Jahnke CN, Caldwell RM, Bermudez JG,  
607 Ramage H, Good MC, Hammer DA. 2018. Controllable protein phase separation and  
608 modular recruitment to form responsive membraneless organelles. *Nat Commun*  
609 **9**:1–12. doi:10.1038/s41467-018-05403-1
- 610 Shen TH, Lin H-K, Scaglioni PP, Yung TM, Pandolfi PP. 2006. The Mechanisms of PML-  
611 Nuclear Body Formation. *Mol Cell* **24**:331–339. doi:10.1016/j.molcel.2006.09.013
- 612 Shima H, Suzuki H, Sun J, Kono K, Shi L, Kinomura A, Horikoshi Y, Ikura T, Ikura M,  
613 Kanaar R, Igarashi K, Saitoh H, Kurumizaka H, Tashiro S. 2013. Activation of the  
614 SUMO modification system is required for the accumulation of RAD51 at sites of  
615 DNA damage. *J Cell Sci* **126**:5284–5292. doi:10.1242/jcs.133744
- 616 Shin Y, Brangwynne CP. 2017. Liquid phase condensation in cell physiology and disease.  
617 *Science* **357**:eaaf4382. doi:10.1126/science.aaf4382
- 618 Sobinoff AP, Pickett HA. 2017. Alternative Lengthening of Telomeres: DNA Repair  
619 Pathways Converge. *Trends Genet* **33**:921–932. doi:10.1016/j.tig.2017.09.003
- 620 Su X, Ditlev JA, Hui E, Xing W, Banjade S, Okrut J, King DS, Taunton J, Rosen MK, Vale  
621 RD. 2016. Phase separation of signaling molecules promotes T cell receptor signal  
622 transduction. *Science* **352**:595–9. doi:10.1126/science.aad9964
- 623 Xu Z-X, Timanova-Atanasova A, Zhao R-X, Chang K-S. 2003. PML Colocalizes with and  
624 Stabilizes the DNA Damage Response Protein TopBP1. *Mol Cell Biol* **23**:4247–4256.  
625 doi:10.1128/MCB.23.12.4247-4256.2003
- 626 Yeager TR, Neumann AA, Englezou A, Huschtscha LI, Noble JR, Reddel RR. 1999.  
627 Telomerase-negative immortalized human cells contain a novel type of

628 promyelocytic leukemia (PML) body. *Cancer Res* **59**:4175–9.

629 Zhang H, Aonbangkhen C, Tarasovetc E V, Ballister ER, Chenoweth DM, Lampson MA.  
630 2017. Optogenetic control of kinetochore function. *Nat Chem Biol* **13**:1096–1101.  
631 doi:10.1038/nchembio.2456

632 Zhang H, Elbaum-Garfinkle S, Langdon EM, Taylor N, Occhipinti P, Bridges AA,  
633 Brangwynne CP, Gladfelter AS. 2015. RNA Controls PolyQ Protein Phase  
634 Transitions. *Mol Cell* **60**:220–30. doi:10.1016/j.molcel.2015.09.017

635 Zhang JM, Yadav T, Ouyang J, Lan L, Zou L. 2019. Alternative Lengthening of Telomeres  
636 through Two Distinct Break-Induced Replication Pathways. *Cell Rep* **26**:955-968.e3.  
637 doi:10.1016/j.celrep.2018.12.102

638

639

640

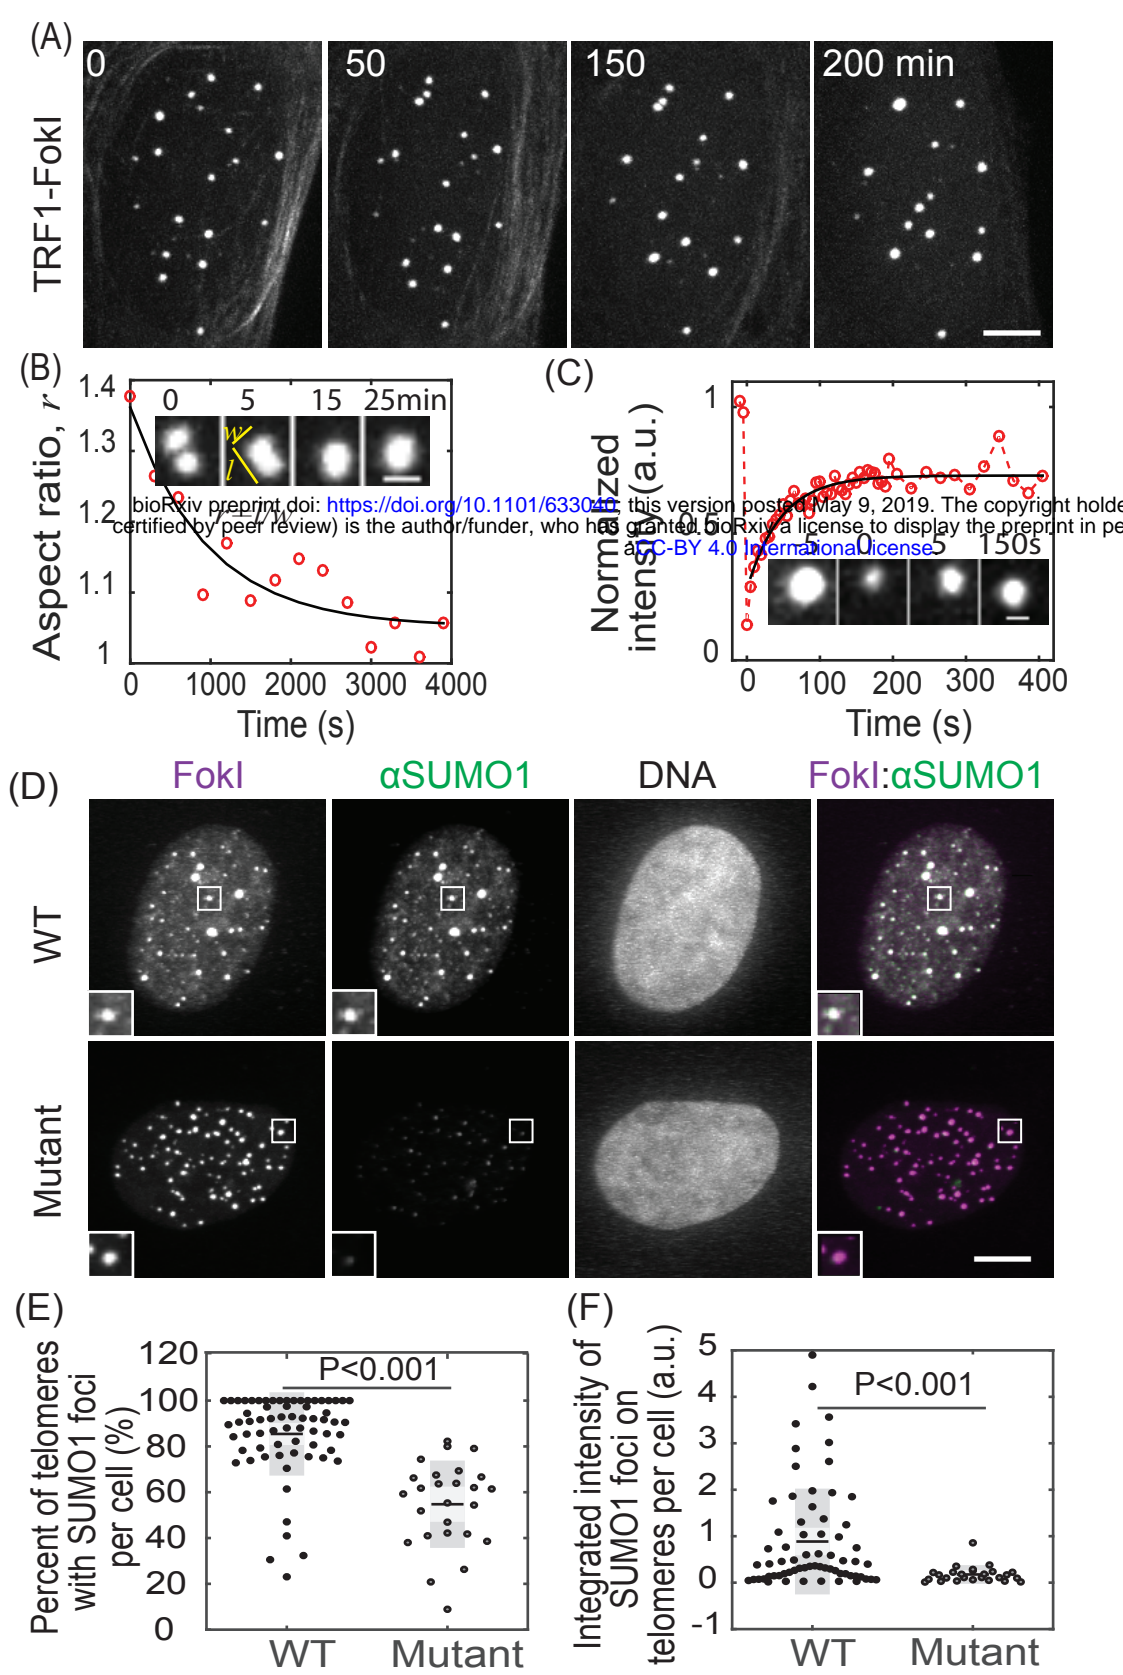

Figure 1 APBs exhibit liquid behavior and concentrate SUMO.



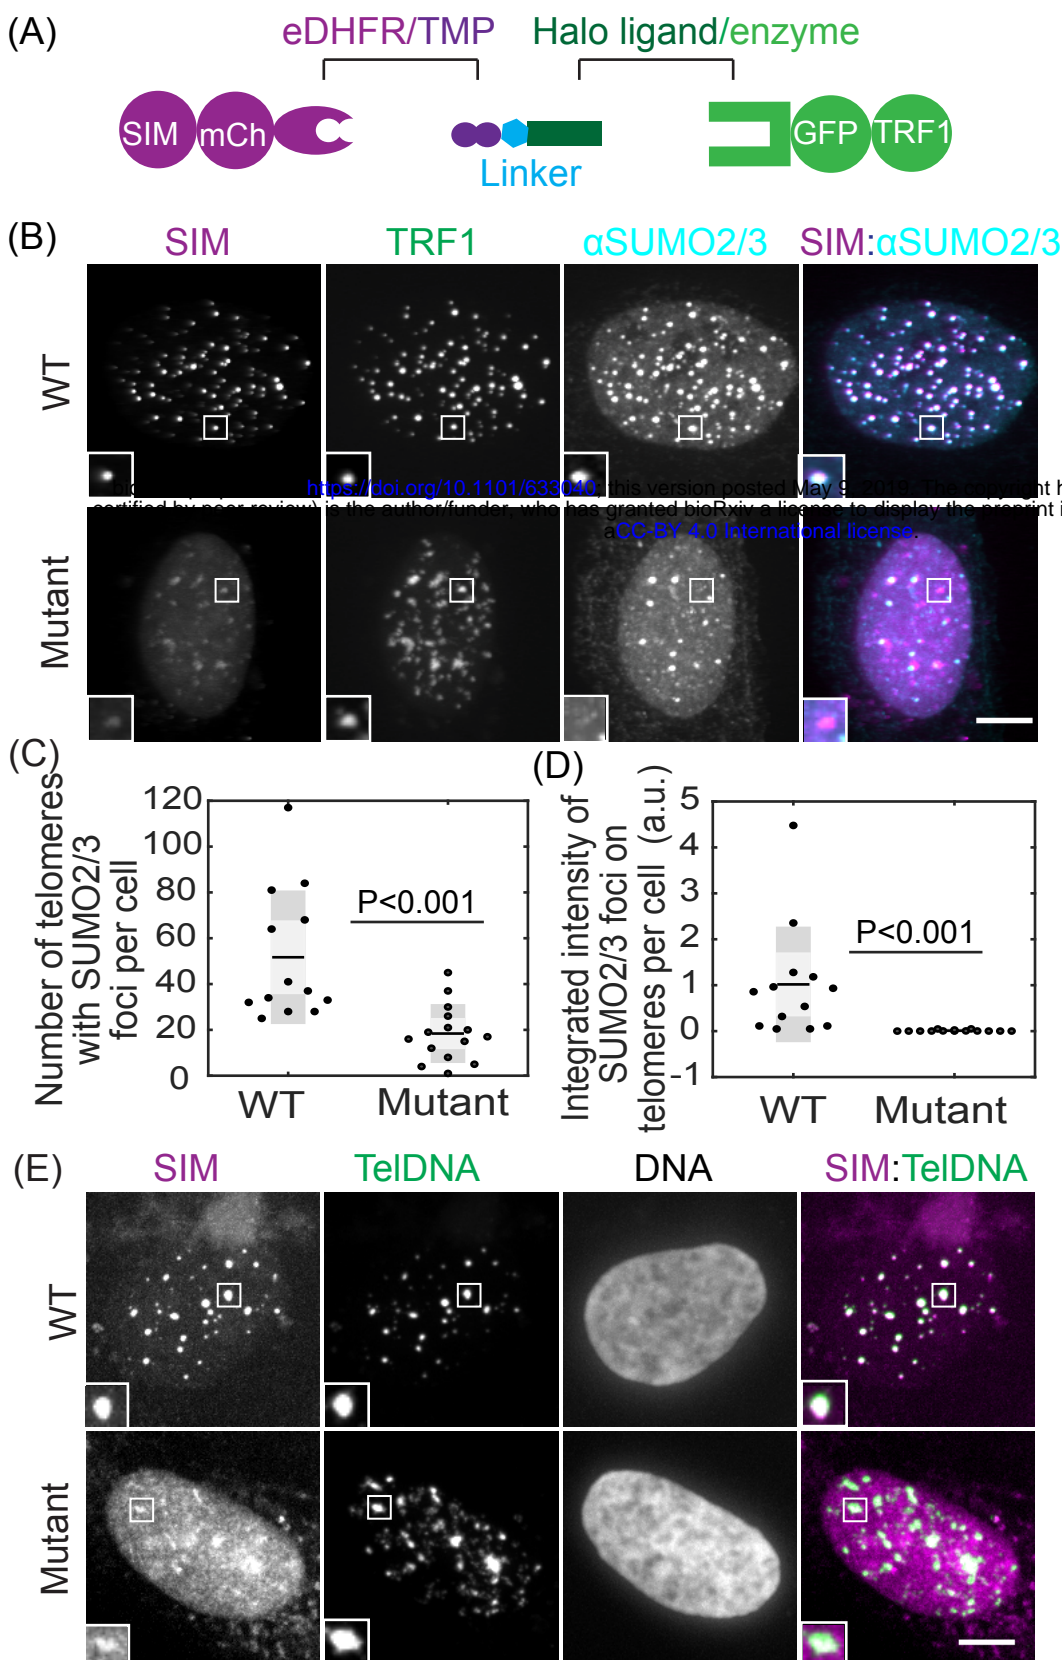

Figure 2. Recruiting SUMO2/3 to telomeres through SIM with chemical dimerizers.

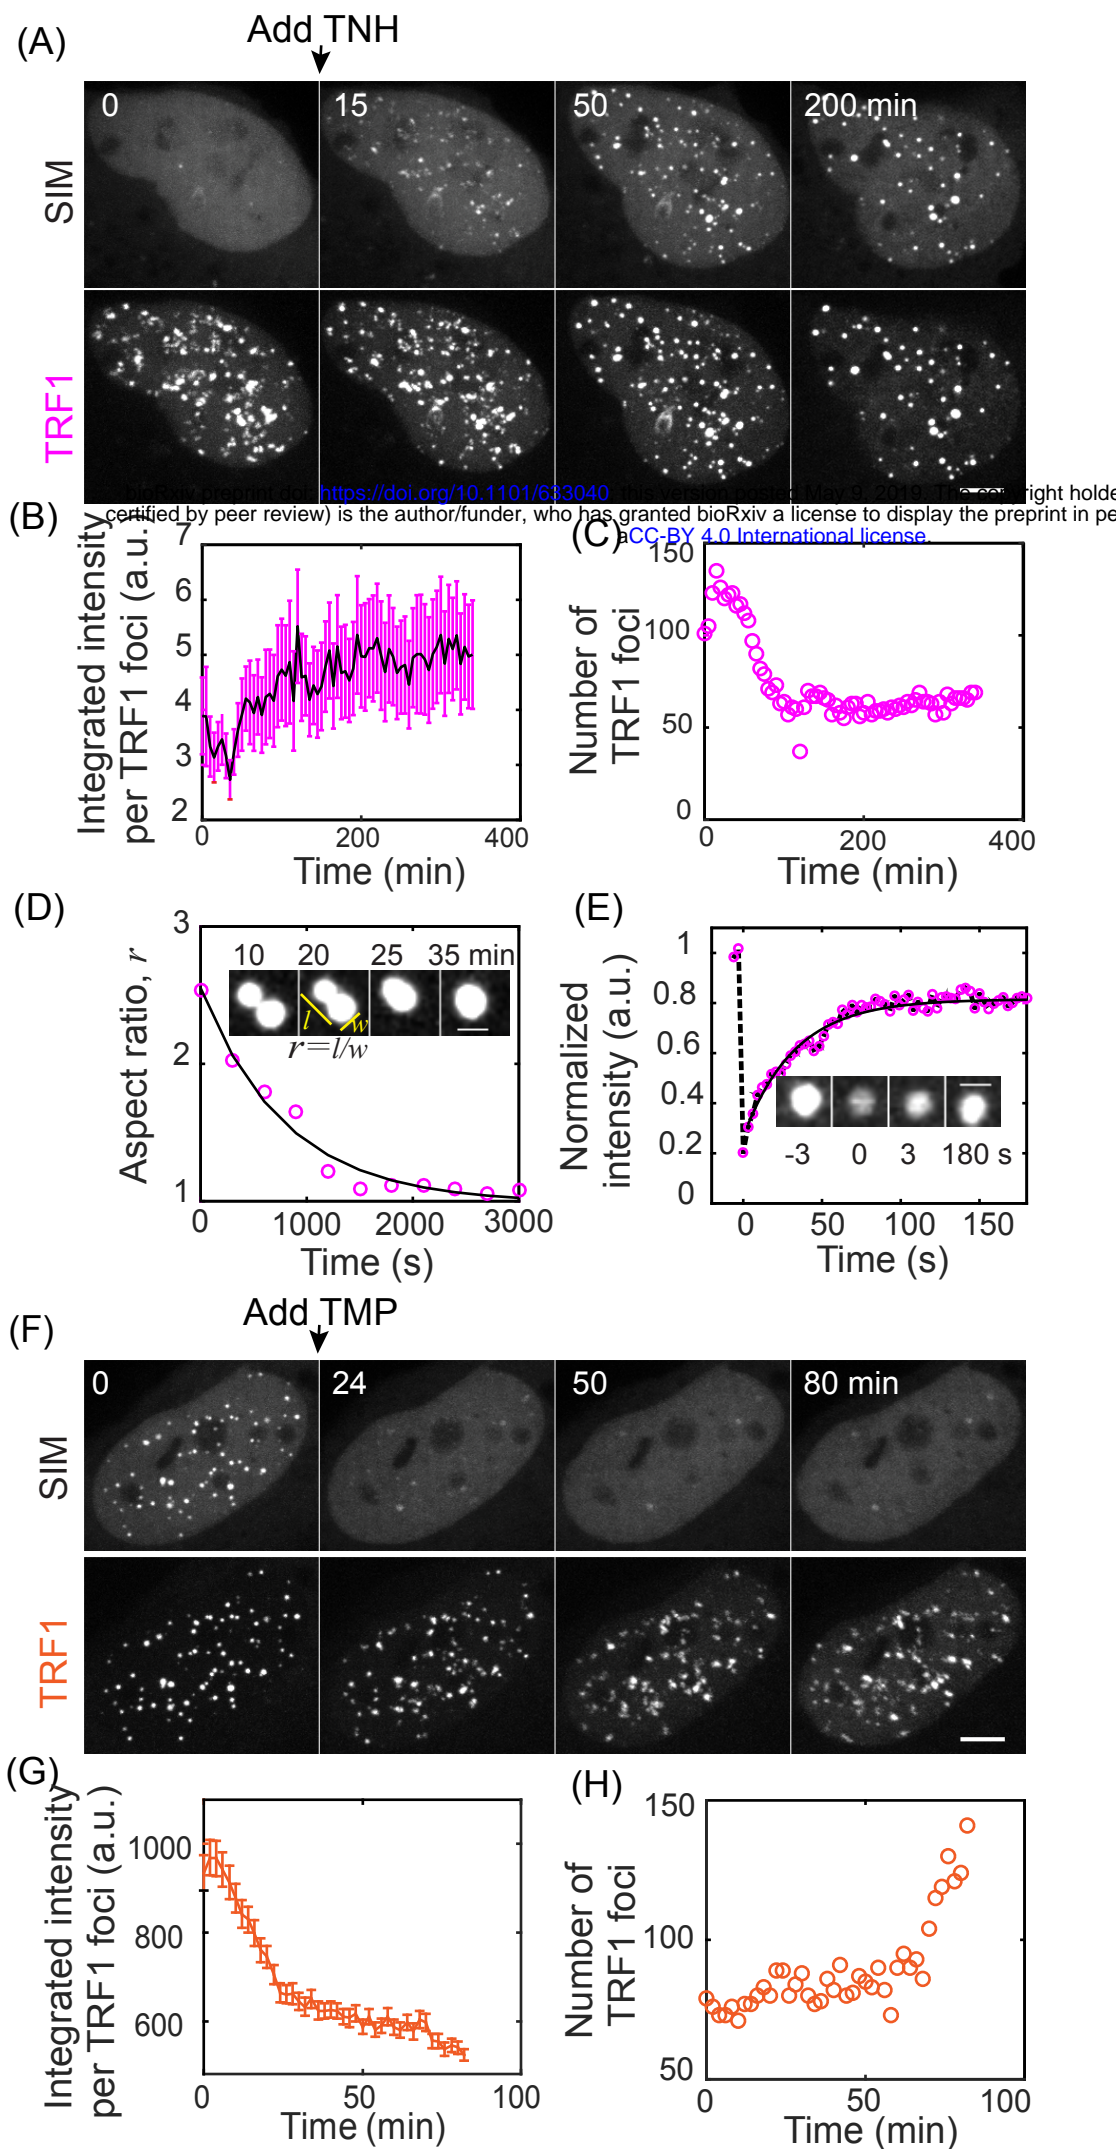

Figure 3. SUMO-SIM interaction drives liquid condensation and telomere clustering.

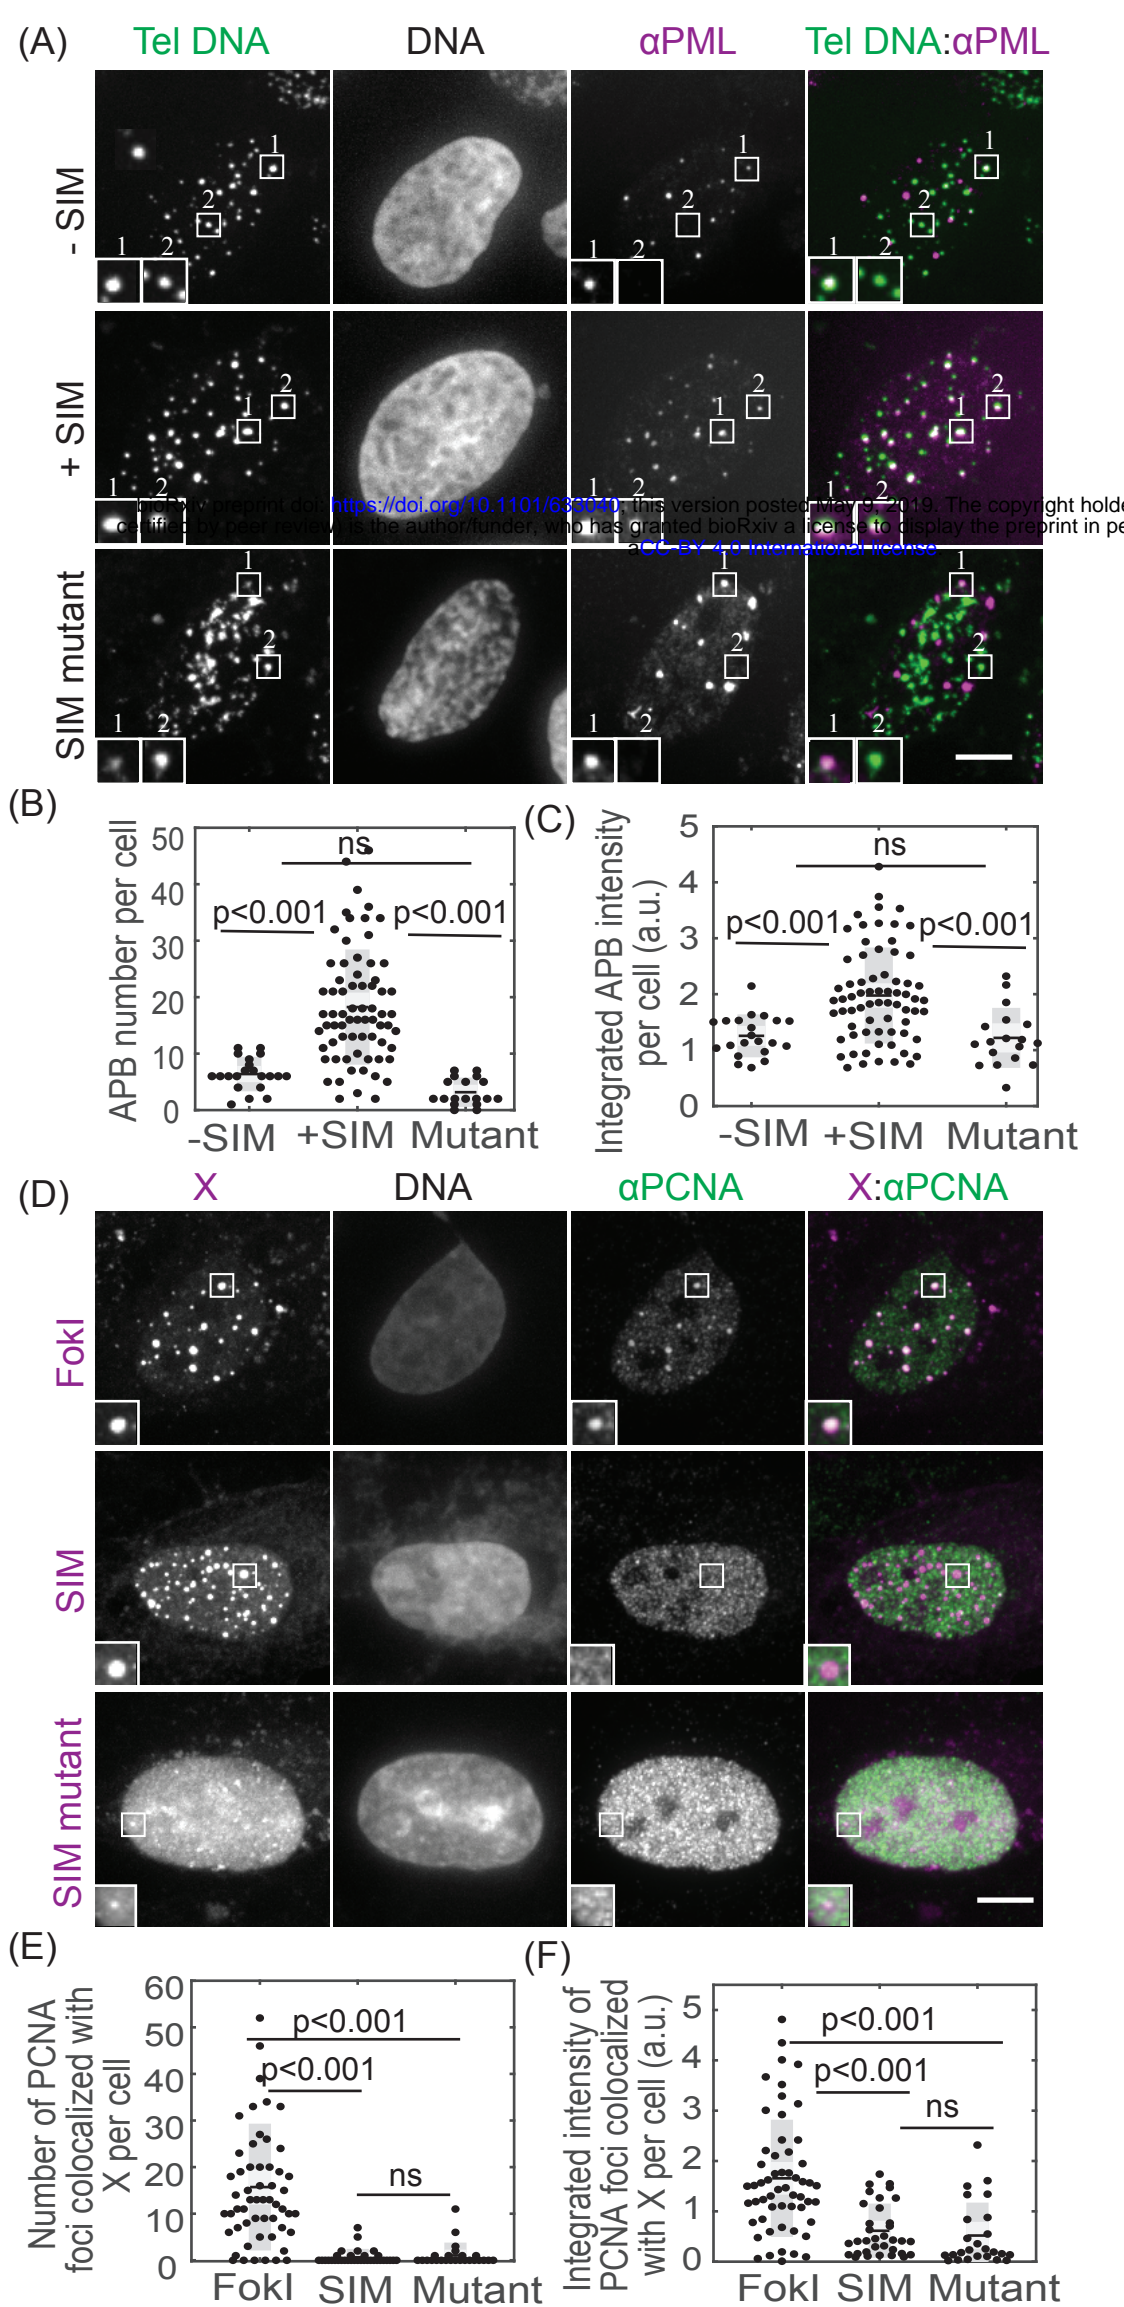

Figure 4. Condensates contain APB scaffold components but not DNA repair factors.

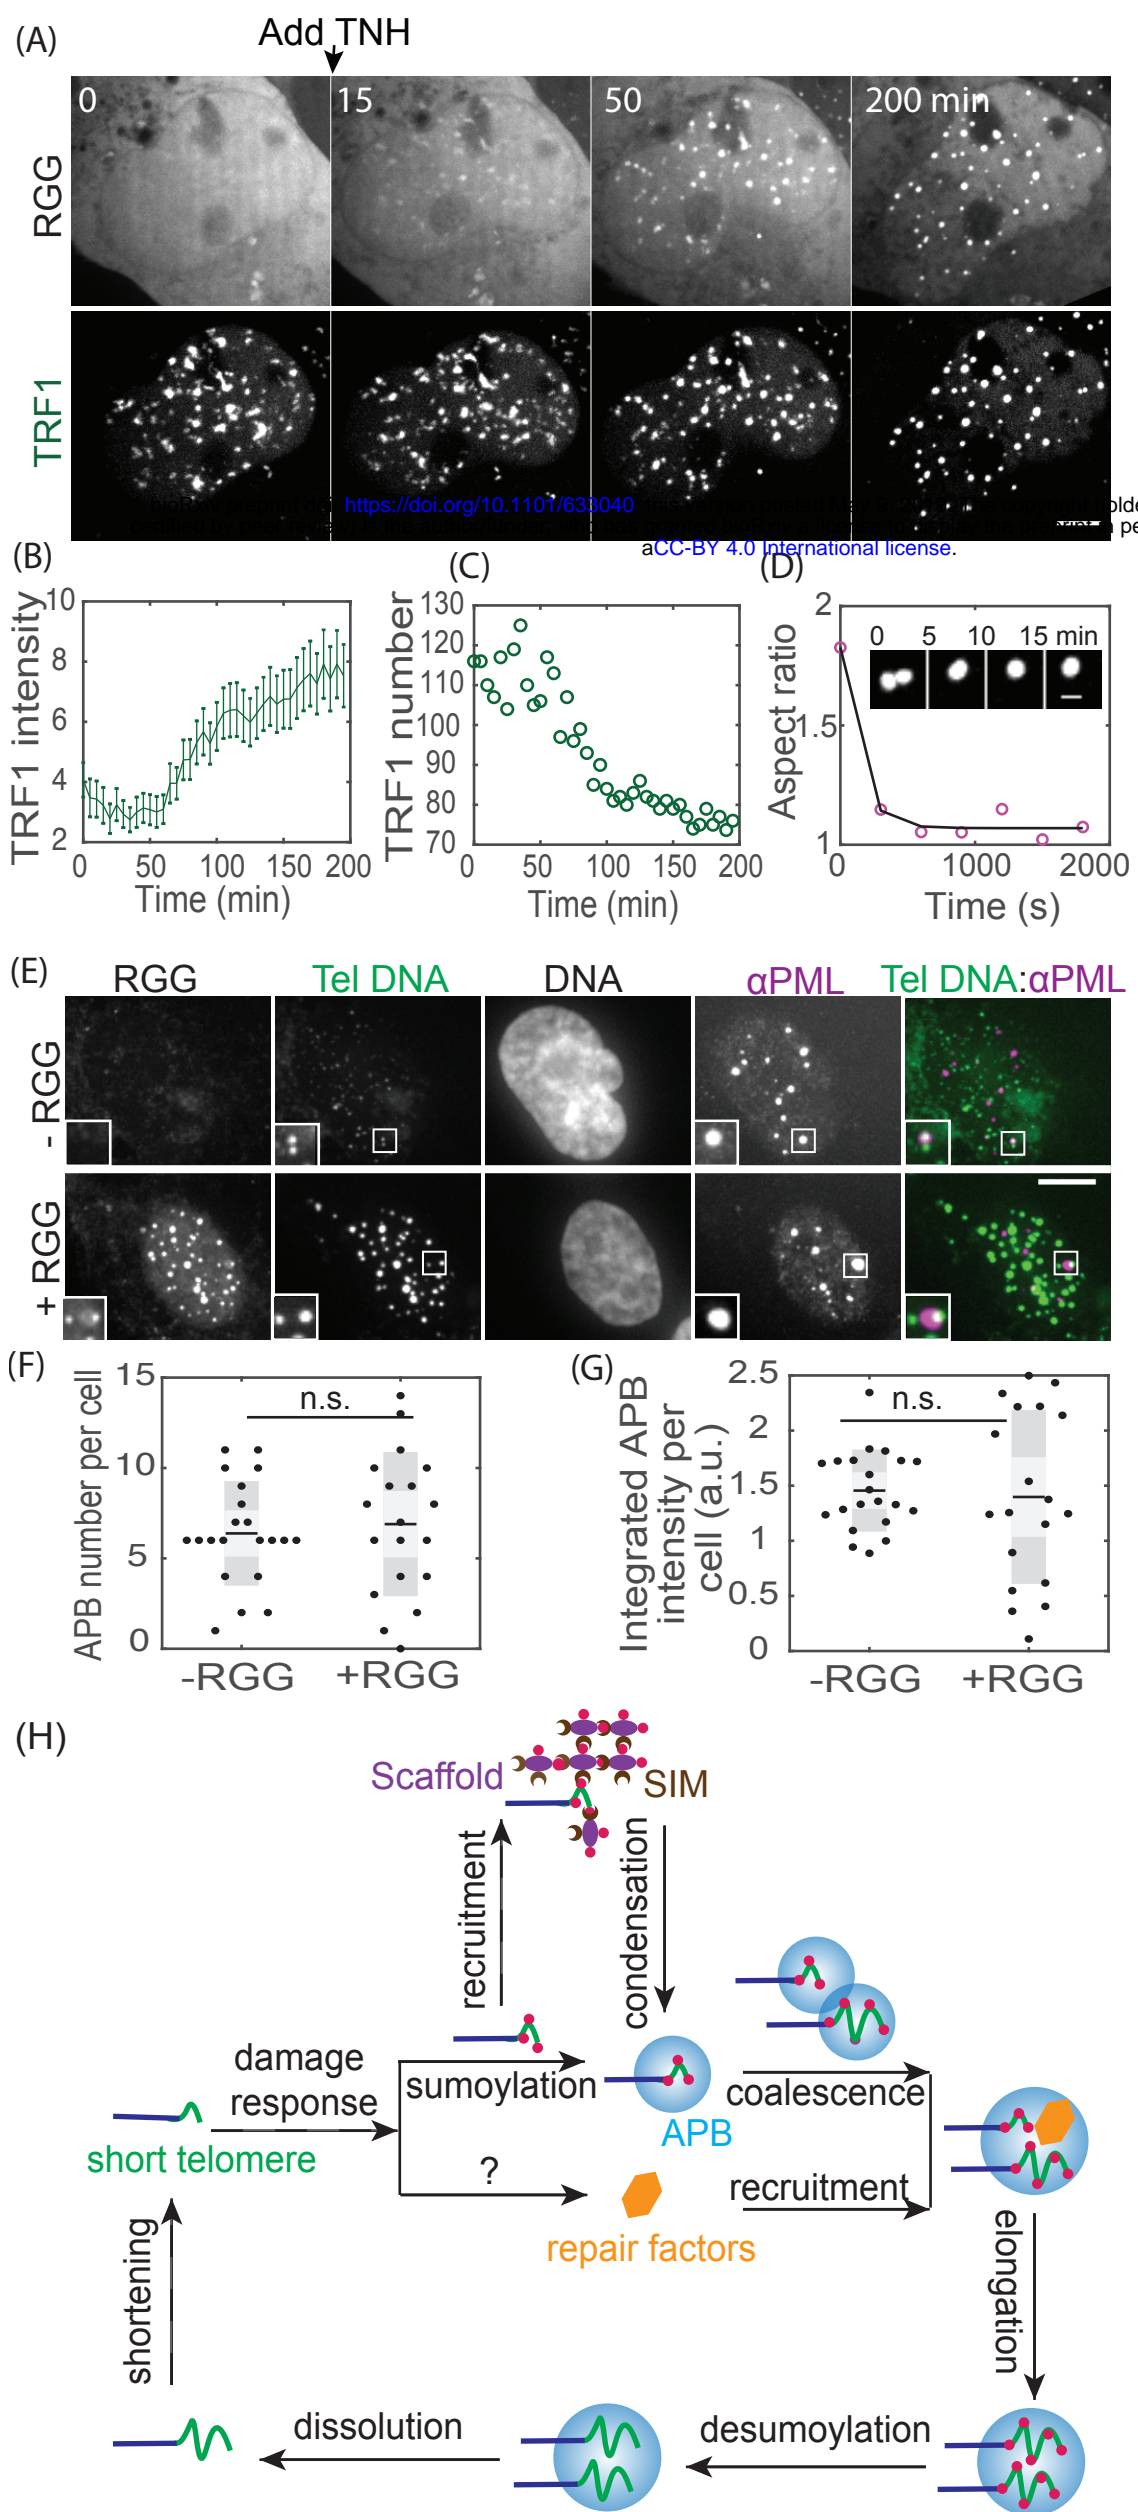

Figure 5. Liquid condensation is sufficient for telomere clustering.

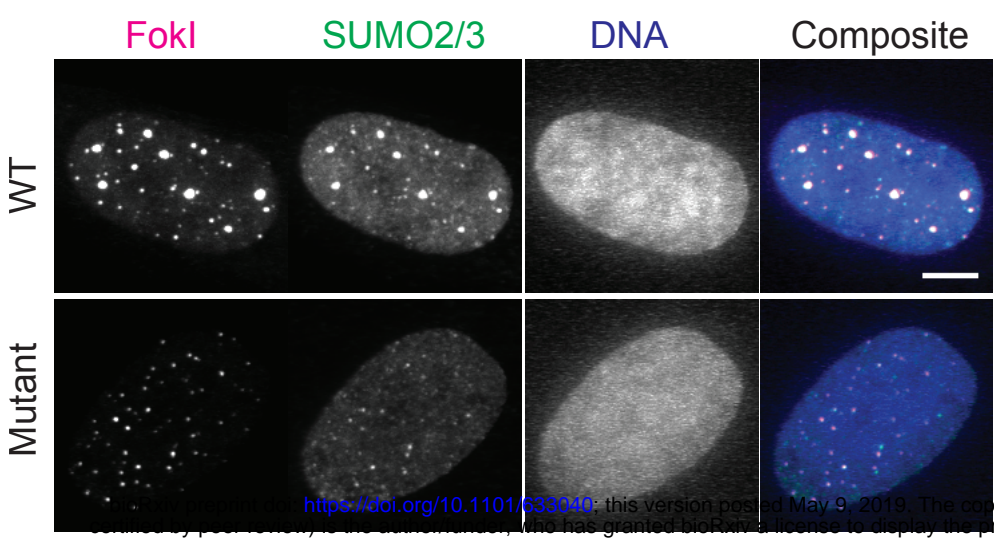

Figure1-S1 DNA damage on telomeres enriches SUMO2/3.

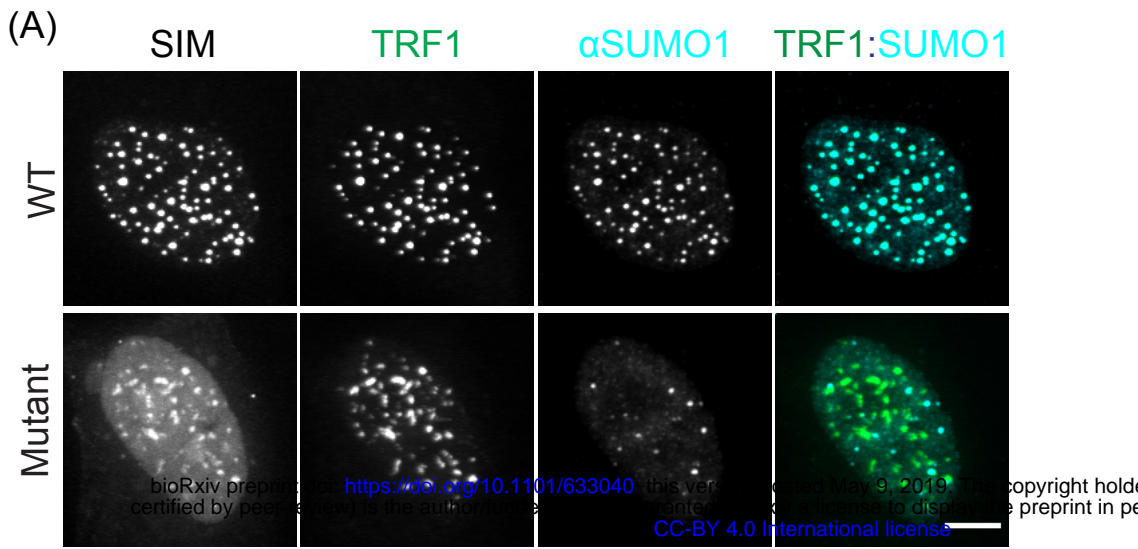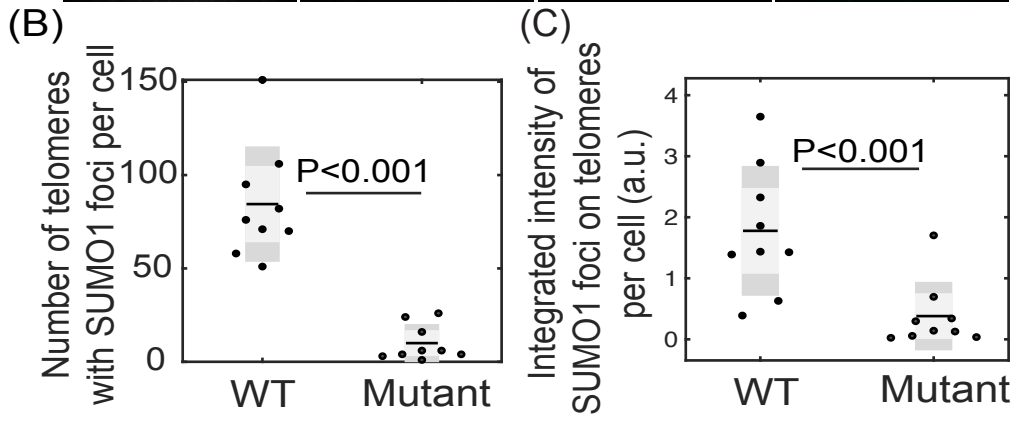

Figure 2-S1. SUMO1 is enriched on telomeres after SIM recruitment.

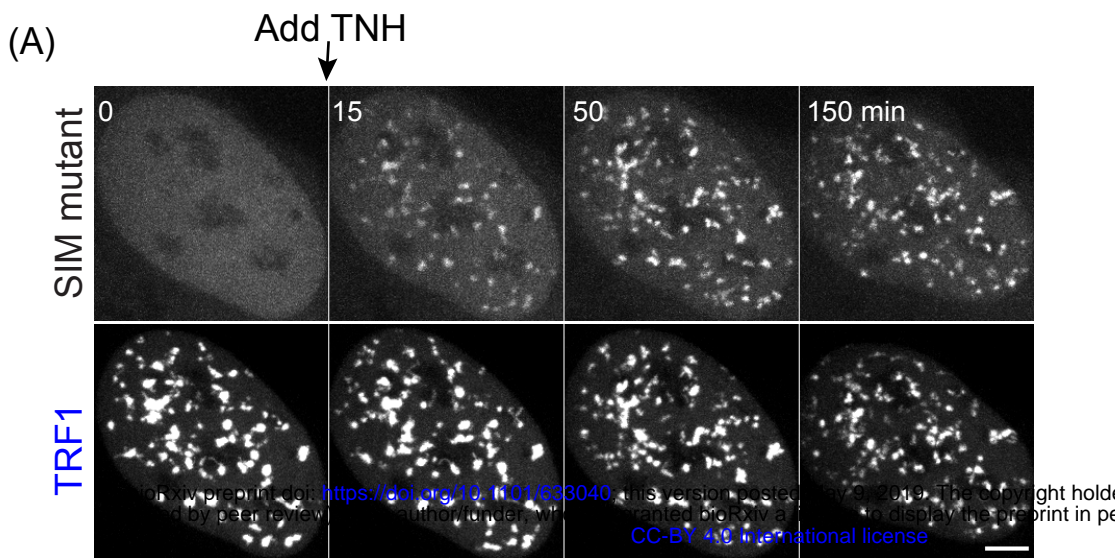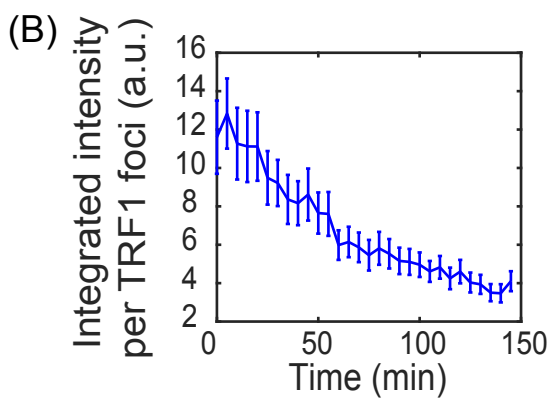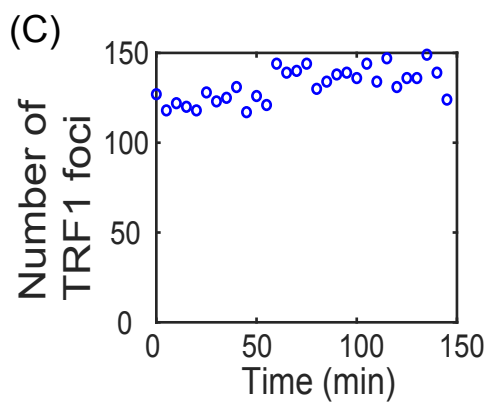

Figure 3-S1. SIM mutant recruited to telomeres cannot induce condensation and clustering.

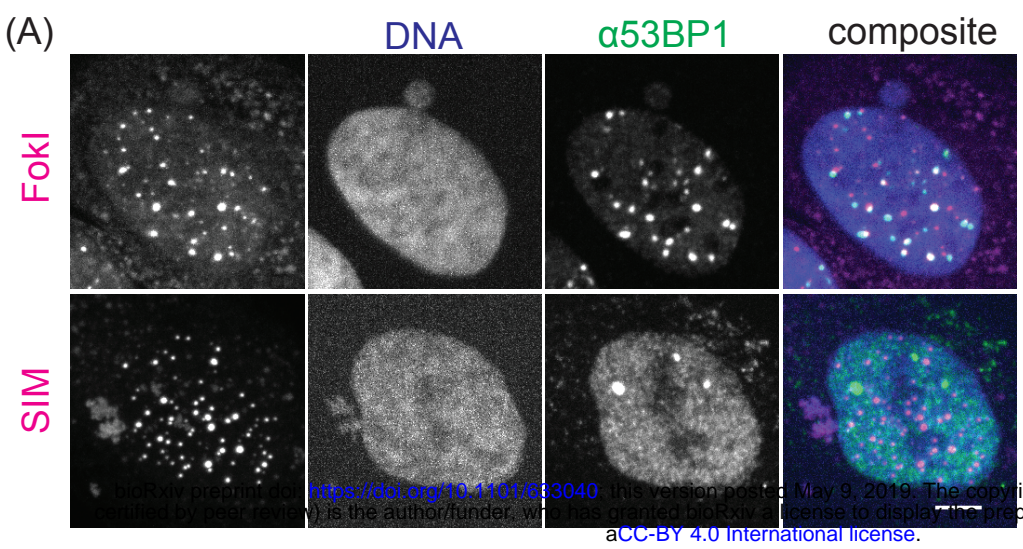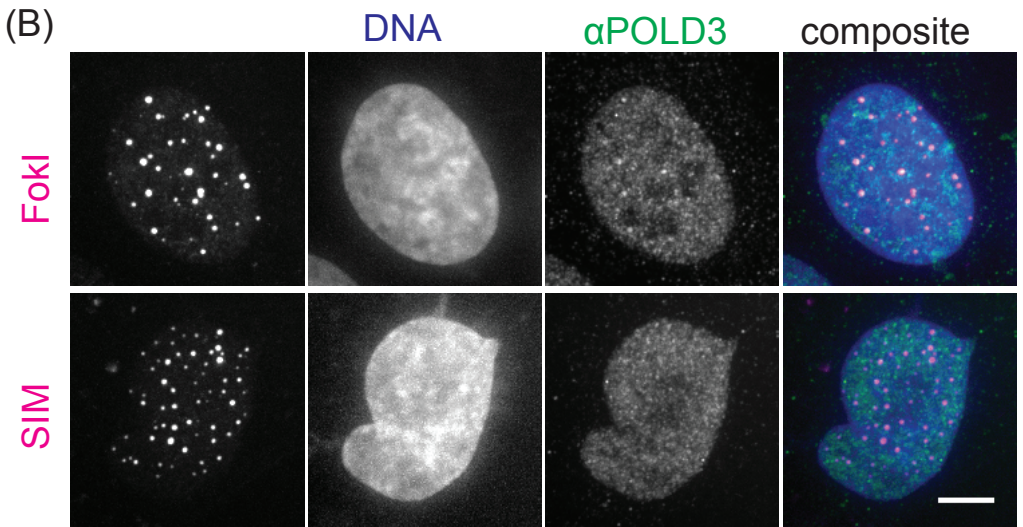

Figure 4-S1. Unlike damage induced APBs, dimerization induced condensates do not enrich 53BP1 or POLD3.
